# Supplementary material for: Lactiplantibacillus plantarum Probio87 improves functional constipation through the gut microbiota–bile acid axis: a randomized controlled trial
Source: Research Square preprint supplement (doi:10.21203/rs.3.rs-8168663/v1), 2025-12-22
Supplement: Supplementary file 1 [file 4b43682bc2b966310c80d962.docx]

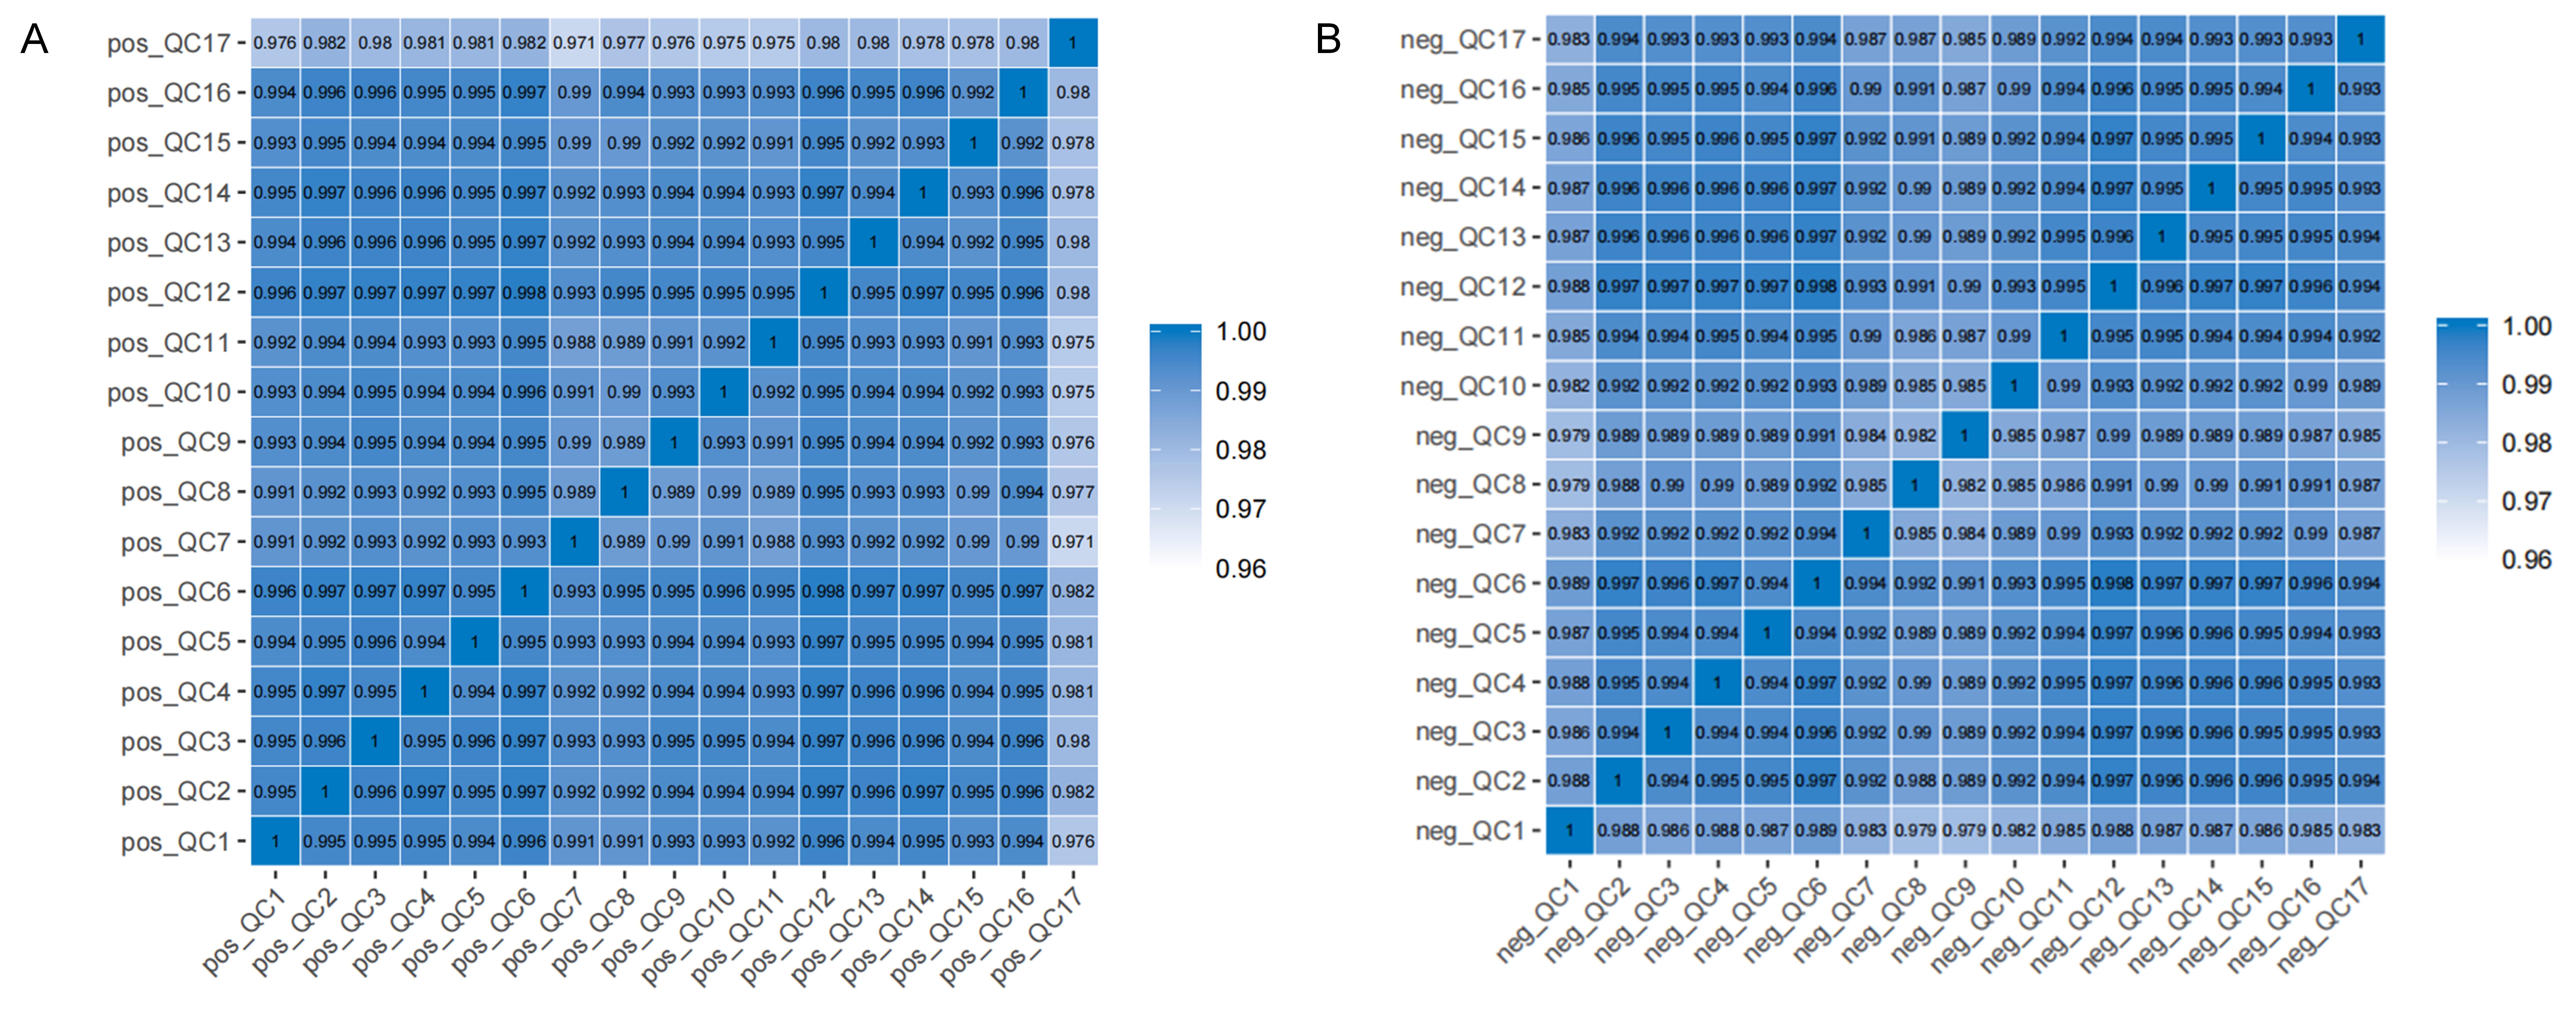


**Figure S1. Pearson correlation coefficients of fecal untargeted metabolomic profiles in quality control (QC) samples.** High correlation coefficients indicate strong consistency and reliability of the metabolomics data, reflecting stable instrument performance and reproducibility throughout the analytical process.


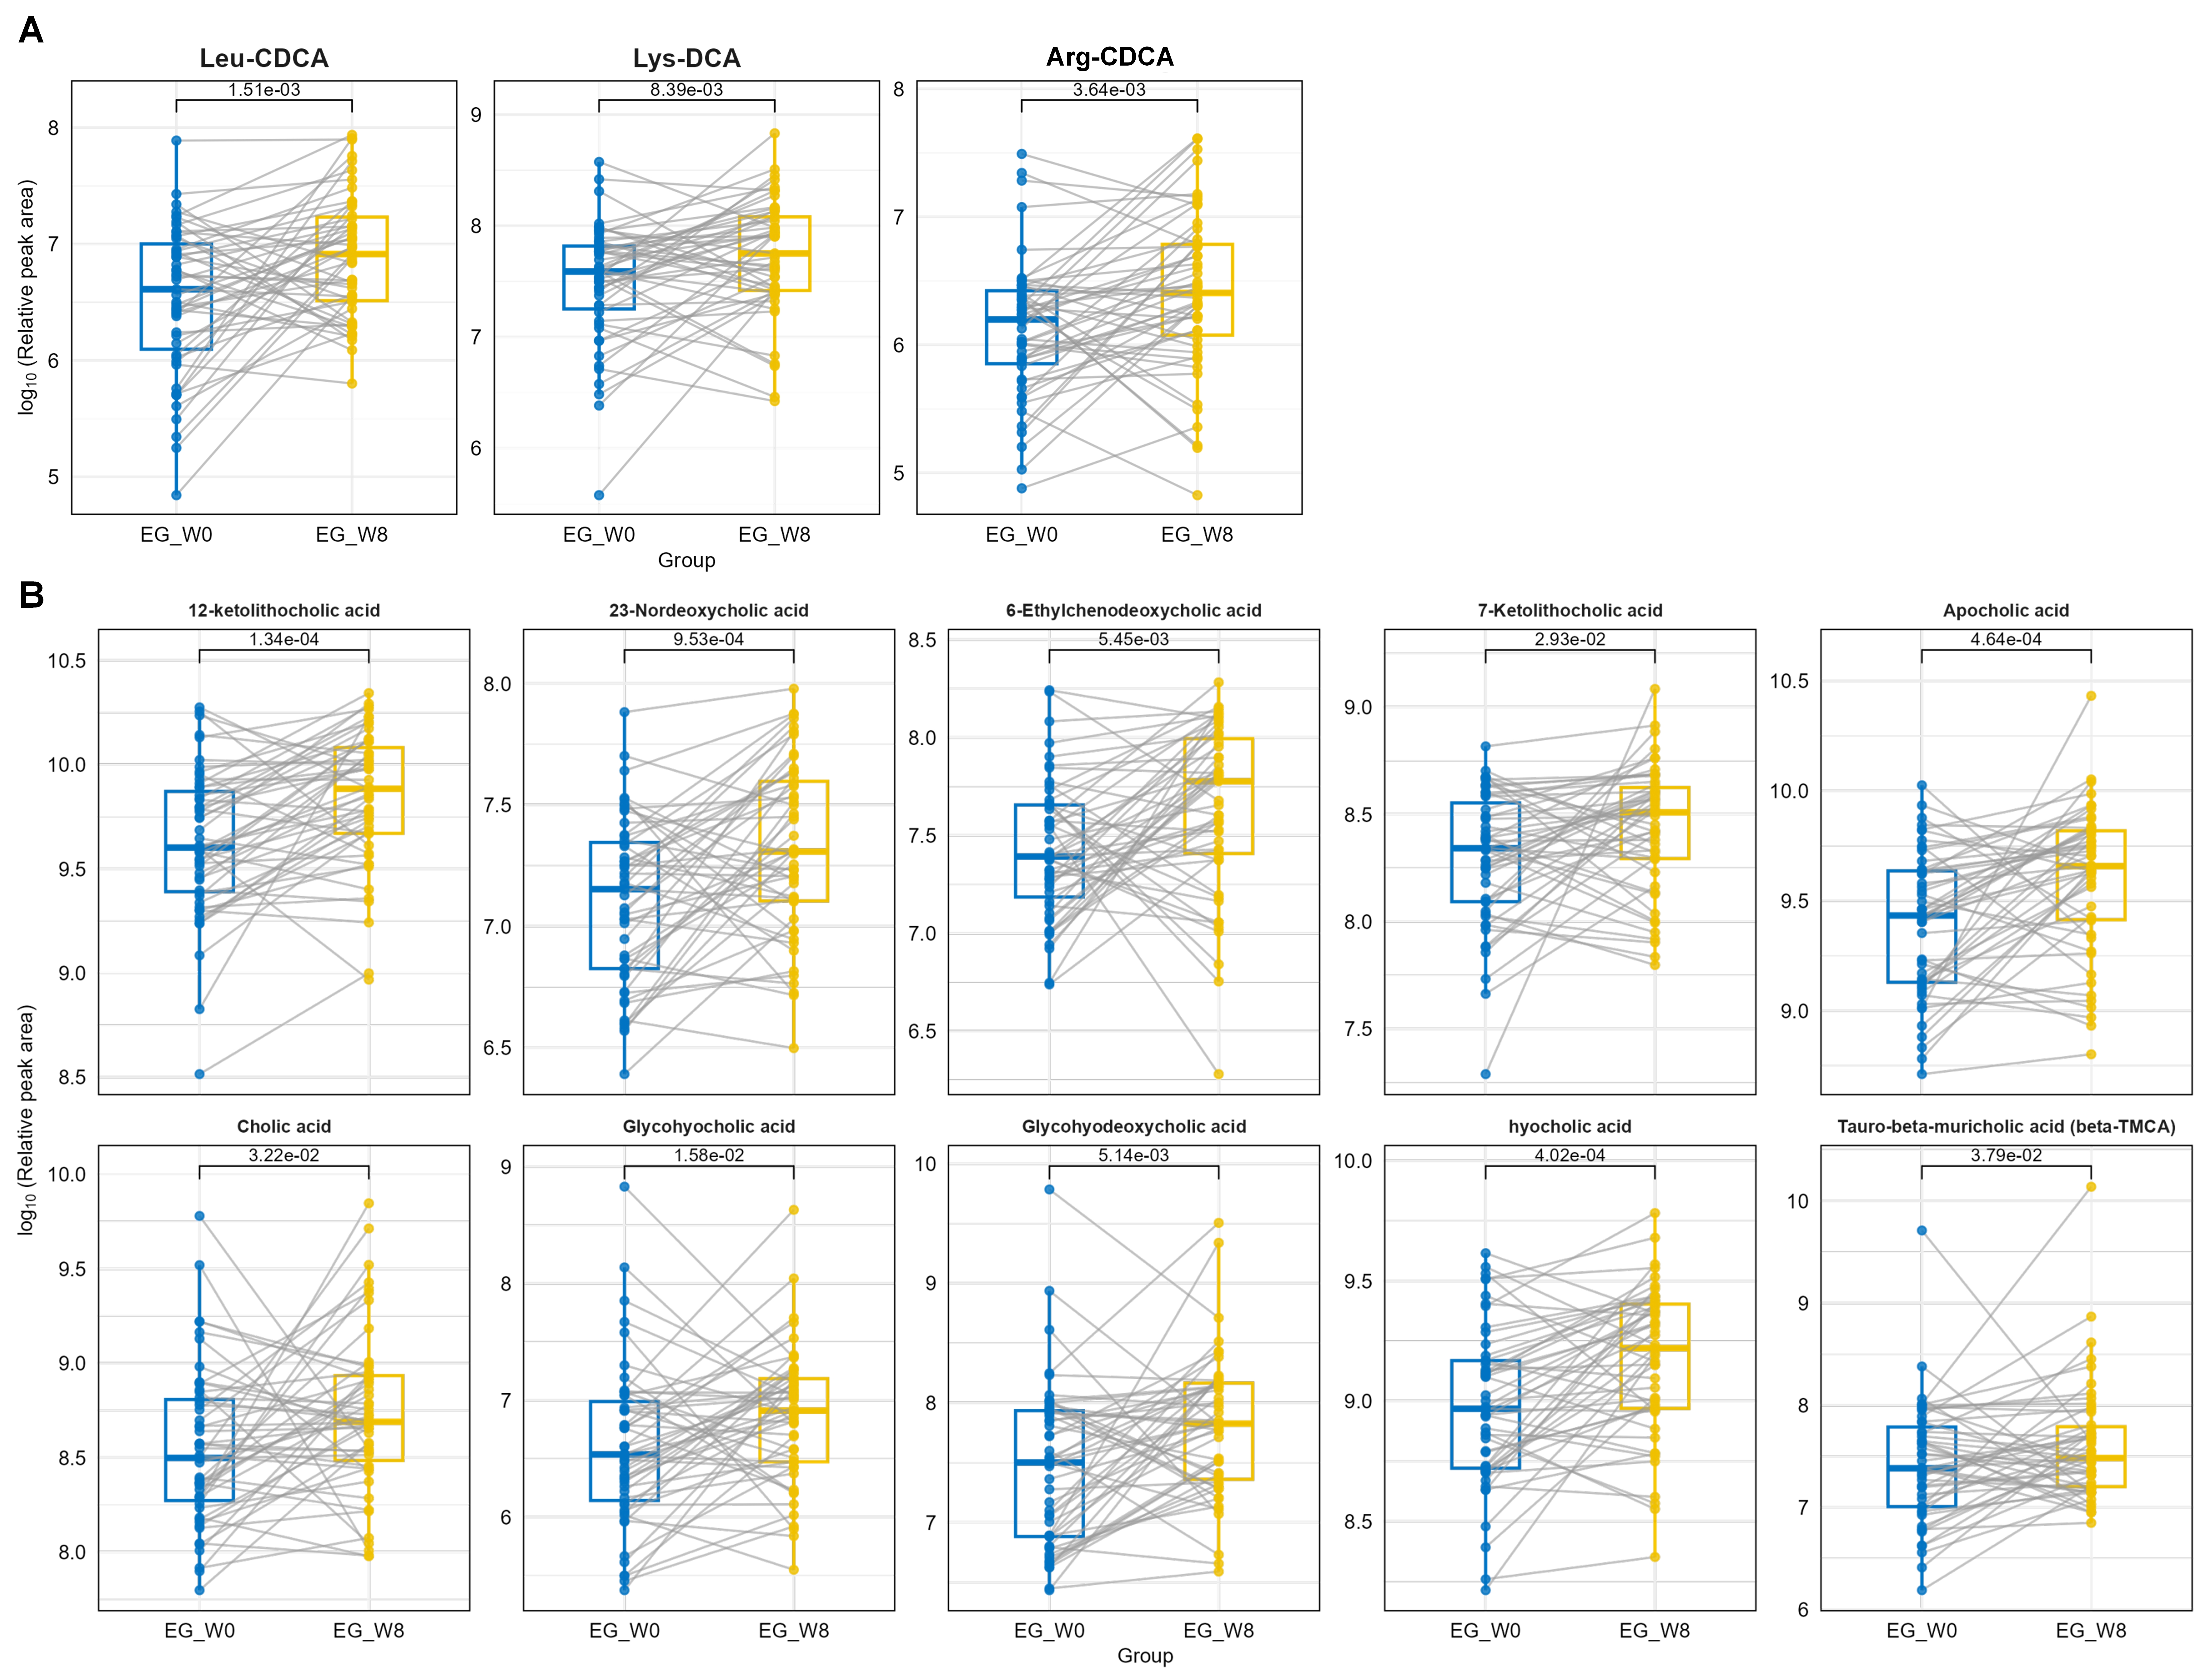


**Figure S2. Differential bile acids (BAs) identified through paired Wilcoxon tests in untargeted and targeted metabolomics datasets. A.** The remaining three differential BA-related metabolites.

**B.** Ten novel differential BAs identified in this study, highlighting metabolic changes in the EG group at W8.

Table S1. Baseline characteristics of the recruited patients with functional constipation

|  | CG (n=50) | EG (n=51) | *P* value |
| --- | --- | --- | --- |
| Female, n (%) | 48 (96.0%) | 48 (94.1%) |  |
| Age (years) | 48.80 ± 21.93 | 44.12 ± 11.20 | 0.182 |
| Duration (years) | 8.56 ± 6.23 | 9.46 ± 6.95 | 0.495 |
| Height (m) | 1.59 ± 0.05 | 1.59 ± 0.05 | 0.848 |
| Body weight (kg) | 56.10 ± 7.00 | 55.61 ± 7.18 | 0.728 |
| BMI (kg/m2) | 22.23 ± 2.57 | 21.96 ± 2.53 | 0.613 |
| ROME score | 3.74 ± 1.08 | 3.85 ± 1.04 | 0.608 |
| CSBM score | 2.28 ± 0.90 | 2.35 ± 1.04 | 0.707 |
| HAMD score | 6.40 ± 5.50 | 5.85 ± 5.58 | 0.627 |
| PAC-QOL score | 51.48 ± 22.34 | 50.49 ± 22.59 | 0.825 |

Table S2. Paired Comparison of PBAs in the EG Group Between W0 and W8

| Full Name | Abbreviation | Metabolomics Type | FC (W8/W0) | *P* value |
| --- | --- | --- | --- | --- |
| Cholic acid | CA | Untargeted | 1.53 | 0.028 |
| Glycocholic acid | GCA | Targeted | 2.30 | 0.015 |
| Glycochenodeoxycholic acid | GCDCA | Untargeted | 2.28 | 0.008 |
| Targeted | 2.91 | 0.005 |
